# Supplementary material for: Anti-bacterial β-cyclodextrin derivatives inspired by the antimicrobial peptide polymyxin in order to better understand the role of single hydrophobic chain tail in selective anti-bacterial activity
Source: Royal Society of Chemistry journal article supplement (doi:10.1039/d3nj01028g), 2023-01-01
Supplement: d3nj01028g1.pdf [file d3nj01028g1.pdf]

## Supporting Information

### Antibacterial $\beta$ -cyclodextrin derivatives inspired by the antimicrobial peptide polymyxin in order to better understand the role of single hydrophobic chain tail in selective anti-bacterial activity

Hatsuo Yamamura,<sup>\*a</sup> Masashi Owaki,<sup>a</sup> Kana Isshiki,<sup>a</sup> Yukari Ishihara,<sup>a</sup> Hisato Kato,<sup>b</sup> Takashi Katsu,<sup>b</sup> Kazufumi Masuda,<sup>b</sup> Kayo Osawa<sup>c</sup> and Atsushi Miyagawa<sup>a</sup>

<sup>a</sup> Graduate School of Engineering, Nagoya Institute of Technology, Gokisocho, Showa-ku, Nagoya 466-8555, Japan

<sup>b</sup> Graduate School of Clinical Pharmacy, Shujitsu University, 1-6-1 Nishigawara, Naka-ku, Okayama-shi, Okayama 703-8516, Japan

<sup>c</sup> Division of Health Science, Department of Medical Technology, Kobe Tokiwa University, Kobe 653-0838, Japan

## Table of contents

|                                                |   |
|------------------------------------------------|---|
| 1. Minimum inhibitory concentration (MIC)..... | 2 |
| 2. Hemolytic activity.....                     | 3 |
| 3. NMR and MS spectra.....                     | 4 |

Table 1. Antibacterial activity of the  $\beta$ -CD derivatives.

|                                  |        |    |                | MIC ( $\mu$ M)   |                    |                |                      |                       |
|----------------------------------|--------|----|----------------|------------------|--------------------|----------------|----------------------|-----------------------|
| $\beta$ -CD                      |        |    |                | Gram-positive    |                    | Gram-negative  |                      |                       |
|                                  | R1     | R2 | $\Sigma$ ClogP | <i>S. aureus</i> | <i>E. faecalis</i> | <i>E. coli</i> | <i>P. aeruginosa</i> | <i>S. Typhimurium</i> |
| <b>noAc<math>\beta</math>-CD</b> |        |    |                |                  |                    |                |                      |                       |
| <b>21</b>                        | H      | H  | -27.2          | >102             | >102               | >102           | >102                 | >102                  |
| <b>12</b>                        | C6H13  | H  | -24.5          | 50               | 99                 | >99            | 99                   | >99                   |
| <b>13</b>                        | C8H17  | H  | -23.5          | 49               | >98                | >98            | >98                  | >98                   |
| <b>14</b>                        | C10H21 | H  | -22.4          | 12               | 49                 | 97             | 49                   | >97                   |
| <b>15</b>                        | C12H25 | H  | -21.3          | 24               | 96                 | 24             | 48                   | 96                    |
| <b>16</b>                        | C14H29 | H  | -20.3          | 24               | 24                 | 12             | 12                   | 95                    |
| <b>17</b>                        | C16H33 | H  | -19.2          | 6                | 12                 | 12             | 12                   | 94                    |
| <b>18</b>                        | C17H35 | H  | -18.7          | 11               | 11                 | 11             | 11                   | 45                    |
| <b>19</b>                        | C18H37 | H  | -18.2          | 11               | 11                 | 11             | 11                   | 45                    |
| <b>20</b>                        | C22H45 | H  | -16.0          | >76              | >76                | >76            | >76                  | >76                   |
| <b>Ac<math>\beta</math>-CDs</b>  |        |    |                |                  |                    |                |                      |                       |
| <b>27</b>                        | H      | Ac | -19.9          | >83              | >83                | >83            | >83                  | >83                   |
| <b>22</b>                        | C8H17  | Ac | -16.4          | 20               | 81                 | 20             | 20                   | 20                    |
| <b>23</b>                        | C10H21 | Ac | -15.3          | 10               | 40                 | 5              | 10                   | 10                    |
| <b>24</b>                        | C12H25 | Ac | -14.3          | 5                | 20                 | 5              | 5                    | 9                     |
| <b>25</b>                        | C16H33 | Ac | -12.1          | 20               | 10                 | 10             | 10                   | 39                    |
| <b>26</b>                        | C22H45 | Ac | -8.4           | 72               | 38                 | 36             | 36                   | 72                    |
| polymyxins B                     |        |    |                | 25               | 194                | 3              | 6                    | 3                     |

Table 2. Hemolytic activity of the  $\beta$ -CD derivatives.

| $\beta$ -CD                      |        |    |                | Hemolytic activity |
|----------------------------------|--------|----|----------------|--------------------|
|                                  | R1     | R2 | $\Sigma$ ClogP | 50 $\mu$ M         |
| <b>noAc<math>\beta</math>-CD</b> |        |    |                |                    |
| <b>21</b>                        | H      | H  | -27.2          | 0.2                |
| <b>12</b>                        | C6H13  | H  | -24.5          | 4.8                |
| <b>13</b>                        | C8H17  | H  | -23.5          | 4.9                |
| <b>14</b>                        | C10H21 | H  | -22.4          | 13.1               |
| <b>15</b>                        | C12H25 | H  | -21.3          | 6.2                |
| <b>16</b>                        | C14H29 | H  | -20.3          | 5.1                |
| <b>17</b>                        | C16H33 | H  | -19.2          | 5.4                |
| <b>18</b>                        | C17H35 | H  | -18.7          | 5.1                |
| <b>19</b>                        | C18H37 | H  | -18.2          | 9.9                |
| <b>20</b>                        | C22H45 | H  | -16.0          | 48.4               |
| <b>Ac<math>\beta</math>-CD</b>   |        |    |                |                    |
| <b>27</b>                        | H      | Ac | -19.9          | 4.8                |
| <b>22</b>                        | C8H17  | Ac | -16.4          | 43.4               |
| <b>23</b>                        | C10H21 | Ac | -15.3          | 63.8               |
| <b>24</b>                        | C12H25 | Ac | -14.3          | 96.8               |
| <b>25</b>                        | C16H33 | Ac | -12.1          | 99.1               |
| <b>26</b>                        | C22H45 | Ac | -8.4           | 67.9               |
| polymyxins B                     |        |    |                | 0.8                |

## NMR and MS spectra
